# Supplementary material for: Comprehensive analysis of differentially expressed profiles of Alzheimer’s disease associated circular RNAs in an Alzheimer’s disease mouse model
Source: publisher site journal article supplement (doi:10.18632/aging.101387), 2018-02-15
Supplement: Supplementary file [file aging-v10i2-101387-supplementary-material-SD1.pdf]

## SUPPLEMENTARY MATERIAL

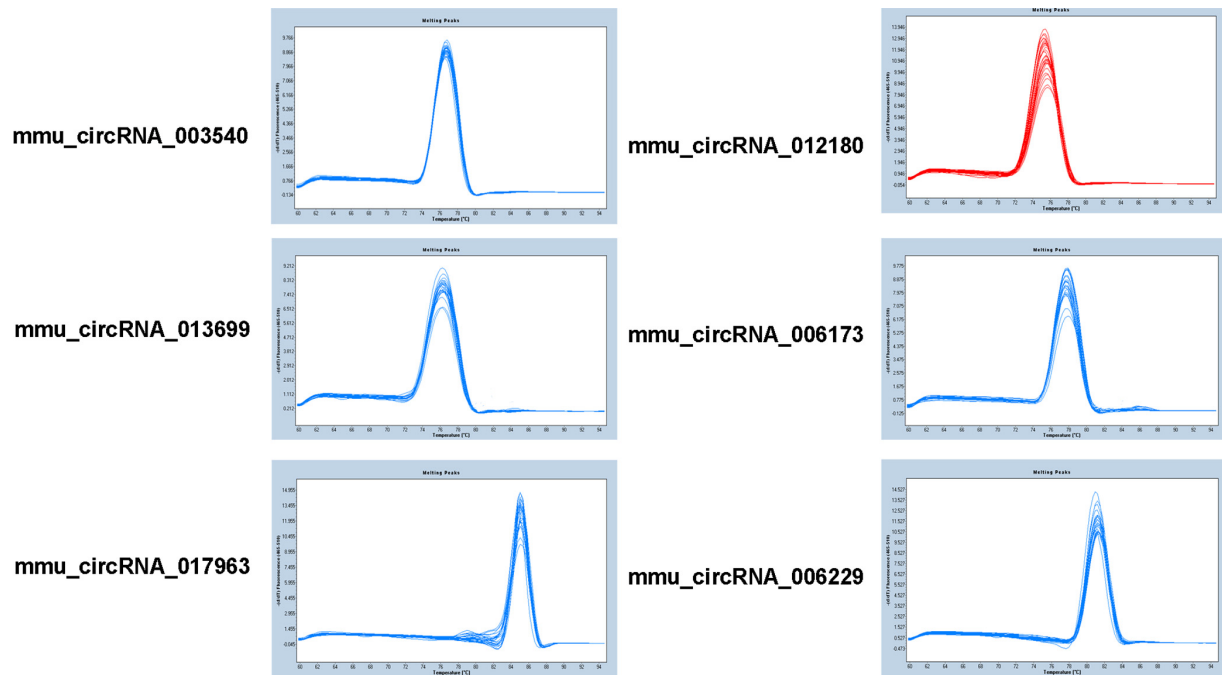

**Supplementary Figure 1.** The melting curve of circRNAs.

### mmu-circRNA-017963 vs mmu-miR-1896

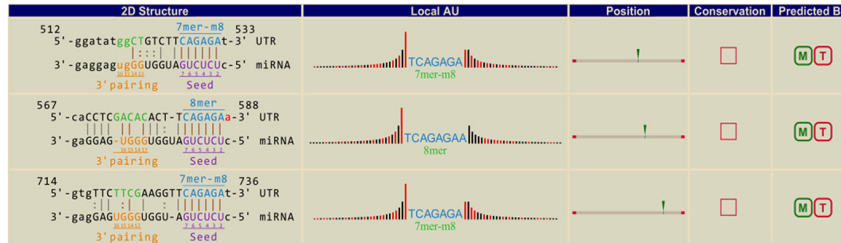

### mmu-circRNA-017963 vs mmu-miR-542-3p

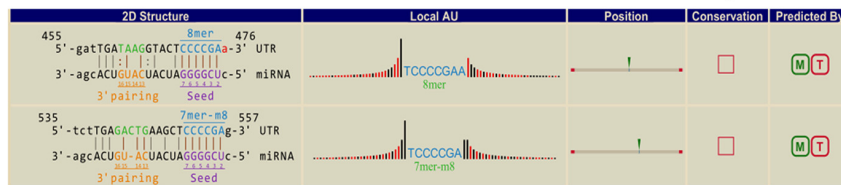

### mmu-circRNA-017963 vs mmu-miR-7030-3p

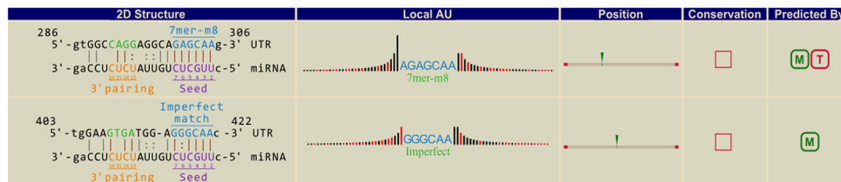

### mmu-circRNA-017963 vs mmu-miR-1955-5p

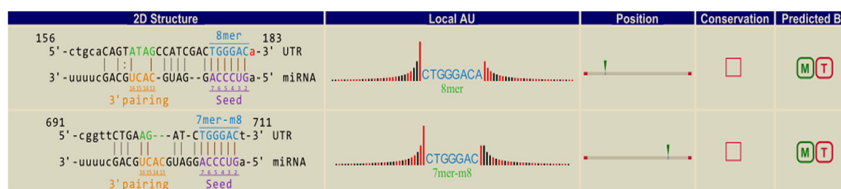

### mmu-circRNA-017963 vs mmu-miR-7033-3p

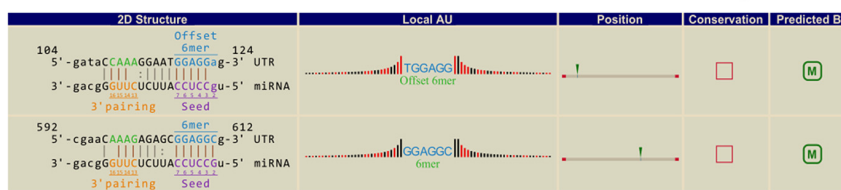

**Supplementary Figure 2.** Five detailed annotation for the circRNA/miRNA interaction (mmu\_circRNA\_017963 and its Top-5 predicted miRNA targets).
